# Supplementary material for: Short Communication: Prognostic Values of a Multiparametric Risk Score in Maize Silage Undergoing Different Ensiling Conditions
Source: MDPI journal article supplement (doi:10.3390/agronomy12040774), 2022-03-23
Supplement: s1 [file s1]

**Table S1:** The pre-ensiled maize composition, the number of observations (N. obs), the minimum value (Min), the maximum value (Max), the first to third quartile (I Q, II Q, and III Q), the mean and the standard deviation (St.Dev.) of the dataset

|                                              | N. obs | Min  | Max  | I Q  | II Q | III Q | Mean | St.Dev. |
|----------------------------------------------|--------|------|------|------|------|-------|------|---------|
| Dry matter (DM, g/kg)                        | 88     | 252  | 437  | 291  | 324  | 365   | 334  | 51.3    |
| Ash (g/kg of the DM)                         | 88     | 32.0 | 45.6 | 36.0 | 37.0 | 39.6  | 37.7 | 2.54    |
| Crude protein (g/kg of the DM)               | 88     | 57.0 | 70.1 | 62.0 | 64.2 | 66.5  | 64.1 | 3.11    |
| Fat (g/kg of the DM)                         | 88     | 22.8 | 33.0 | 26.4 | 27.8 | 28.0  | 27.5 | 2.05    |
| aNDF (g/kg of the DM)                        | 88     | 364  | 482  | 389  | 428  | 458   | 423  | 34.0    |
| ADF (g/kg of the DM)                         | 88     | 197  | 280  | 214  | 241  | 263   | 239  | 25.5    |
| Lignin (g/kg of the DM)                      | 88     | 22.0 | 31.8 | 25.0 | 28.0 | 30.9  | 27.7 | 3.09    |
| Starch (g/kg of the DM)                      | 88     | 240  | 394  | 290  | 303  | 323   | 307  | 34.3    |
| Water soluble carbohydrates (g/kg of the DM) | 88     | 43   | 91   | 56   | 68   | 76    | 66   | 12.5    |
| Density (kg/m <sup>3</sup> )                 | 88     | 141  | 226  | 164  | 179  | 200   | 182  | 22.0    |
| Porosity (decimals)                          | 88     | 0.44 | 0.63 | 0.50 | 0.53 | 0.57  | 0.53 | 0.05    |

**Table S2:** The means for pre-ensiled chemical traits of harvested maize in 2018, 2019, and 2020, the means for pre-ensiled chemical traits of silages performed (event =1) or not (event = 0) the event of aerobic instability.

|                                              | Outcomes |      |       | Years |       |       |         |
|----------------------------------------------|----------|------|-------|-------|-------|-------|---------|
|                                              | 0        | 1    | P     | 2018  | 2019  | 2020  | P       |
| Dry matter (DM, g/kg)                        | 334      | 334  | 0.99  | 321b  | 297b  | 373a  | < 0.001 |
| Ash (g/kg of the DM)                         | 37.3     | 38.1 | 0.1   | 40.2a | 38.2b | 36.0c | < 0.001 |
| Crude protein (g/kg of the DM)               | 64.0     | 64.3 | 0.73  | 66.0a | 66.0a | 61.6b | < 0.001 |
| Fat (g/kg of the DM)                         | 27.6     | 27.3 | 0.41  | 25.7c | 27.3b | 28.6a | < 0.001 |
| aNDF (g/kg of the DM)                        | 424      | 421  | 0.75  | 457a  | 446b  | 387c  | < 0.001 |
| ADF (g/kg of the DM)                         | 240      | 236  | 0.54  | 262a  | 257a  | 212b  | < 0.001 |
| Lignin (g/kg of the DM)                      | 240      | 237  | 0.54  | 262a  | 257a  | 212b  | < 0.001 |
| Starch (g/kg of the DM)                      | 308      | 306  | 0.81  | 266c  | 301b  | 331a  | < 0.001 |
| Water soluble carbohydrates (g/kg of the DM) | 63.3     | 71.7 | 0.003 | 66.3  | 66.6  | 65.3  | 0.91    |
| Density (kg/m <sup>3</sup> )                 | 181      | 185  | 0.44  | 161b  | 168b  | 204a  | < 0.001 |
| Porosity (decimals)                          | 0.53     | 0.54 | 0.25  | 0.50b | 0.52b | 0.56a | < 0.001 |

**Table S3:** Univariate Cox Model for the event of aerobic instability, evaluated for qualitative variables. The use of inoculant (inoculant = 1) for *Lactobacillus buchneri* (Lb), compared with the control (pure water); the time of silos sealing delays of 6 and 20 h, compared with 1 h delay; the harvesting years 2019 and 2020, compared with 2018. Univariable Cox Model for the event of aerobic instability evaluated for density and porosity.

|                              | Hazard ratio | Lower 95%CI | Upper 95%CI | p.value | P (cox.zph) |
|------------------------------|--------------|-------------|-------------|---------|-------------|
| Inoculant = 1                | 0.76         | 0.35        | 1.62        | 0.47    | 0.27        |
| delay 6                      | 1.40         | 0.58        | 3.38        | 0.45    | 0.19        |
| delay 20                     | 1.77         | 0.75        | 4.17        | 0.19    | 0.19        |
| Year 2019                    | 10.0         | 1.33        | 75.6        | 0.02    | 0.11        |
| Year 2020                    | 5.72         | 0.74        | 44.0        | 0.09    | 0.11        |
| Density (kg/m <sup>3</sup> ) | 1.01         | 0.99        | 1.02        | 0.50    | 0.52        |
| Porosity (decimals)          | 32.34        | 0.03        | 39980       | 0.34    | 0.25        |

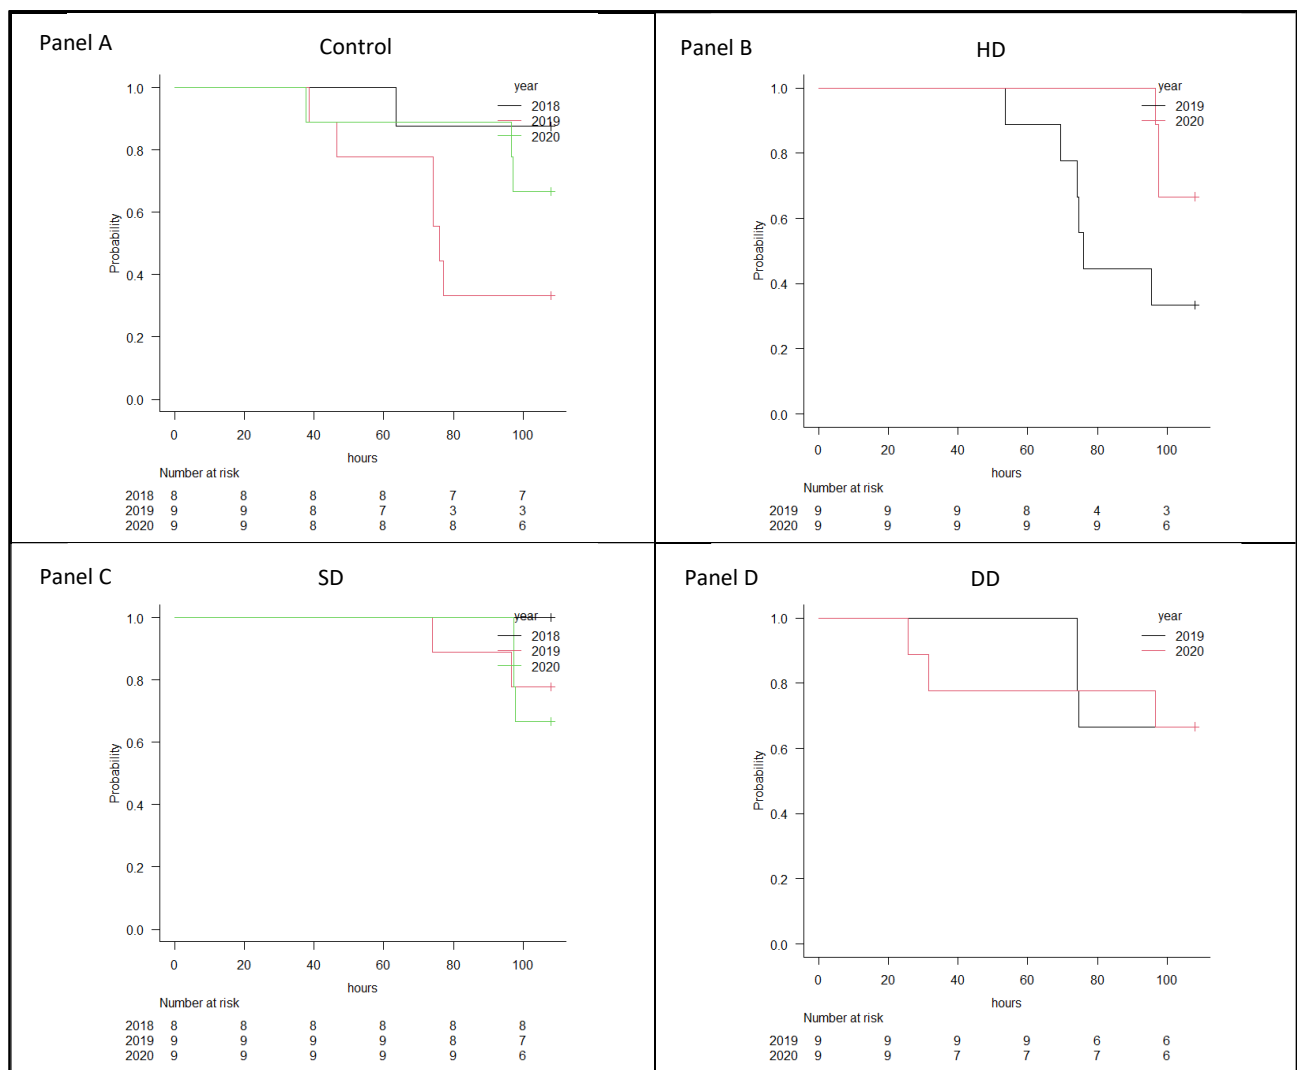

**Figure S1.** The Kaplan-Meier stratified per *Lactobacillus buchneri* (Lb) dosage for the different years (2018, 2019, and 2020). Panel A, the Kaplan-Meier curve for the probability of aerobic instability onset of maize silage exposed to air right-censored at 108 h, using pure water (inoculant = 0, control,  $p = 0.05$ ). Panel B, C and D, the Kaplan Meier curve for the probability of aerobic instability onset of maize silage exposed to air right-censored at 108 h, for the use of Lb (inoculant = 1) for maize treated with a half dosage (HD,  $p = 0.05$ ), standard dosage (SD,  $p = 0.26$ ), or double dosage (DD,  $p = 0.92$ ), respectively.

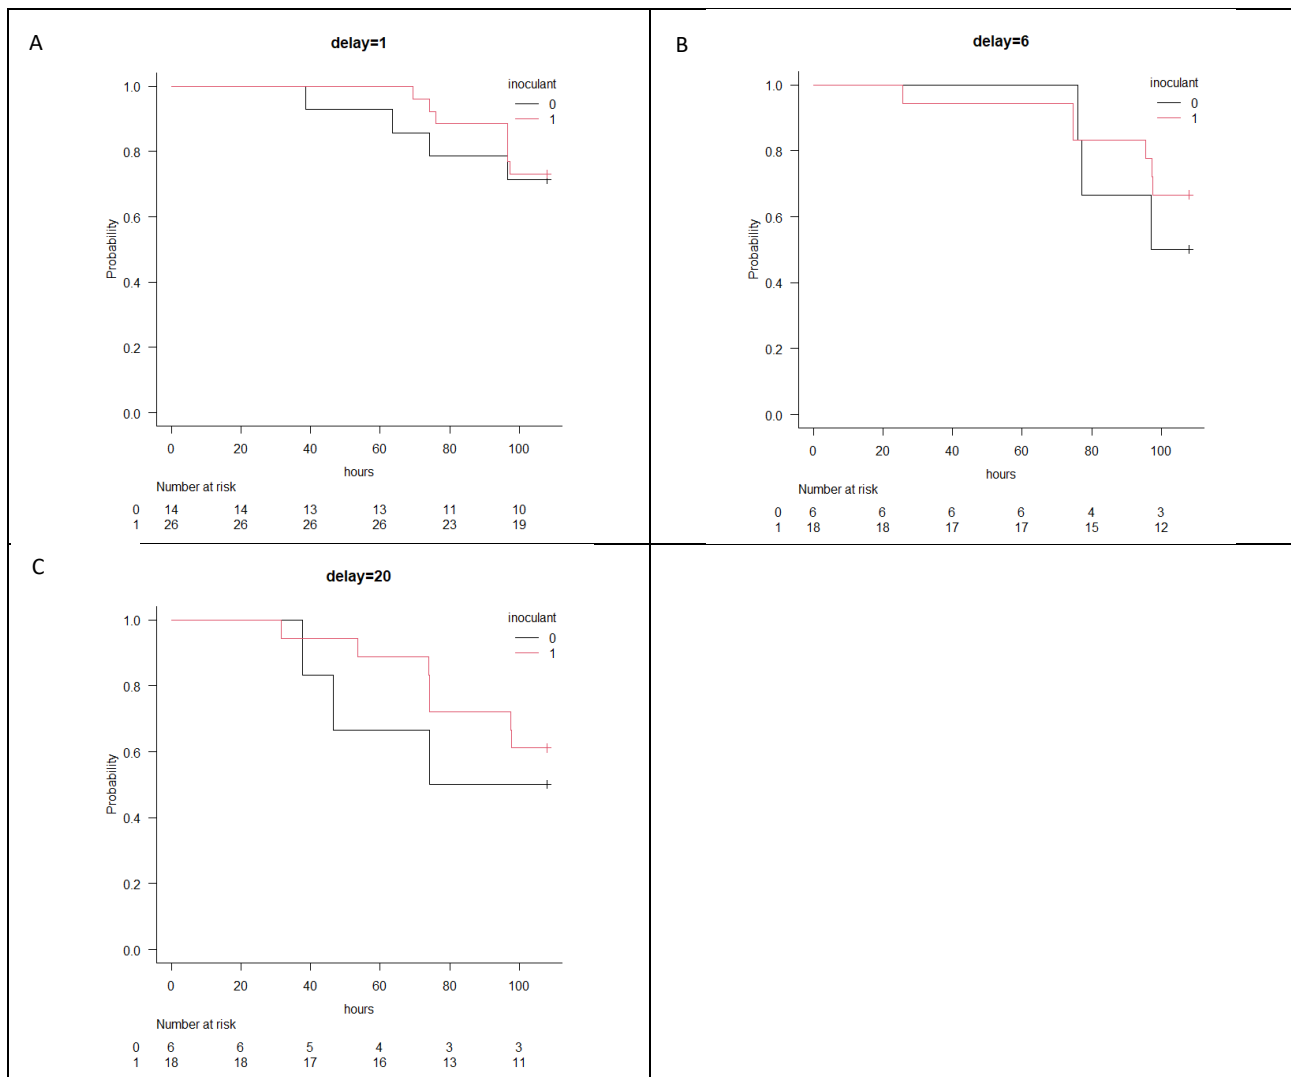

**Figure S2.** The Kaplan Meier stratified per delays for *Lactobacillus buchneri* (Lb). (A), (B) and (C), the Kaplan Meier curve for the probability of aerobic instability onset of maize silage exposed to air right-censored at 108 h, using pure water (inoculant = 0, control) or with the use of Lb (inoculant = 1, regardless of the dosage) at silos sealing delay of 1 h ( $p = 0.79$ ), 6 h ( $p = 0.48$ ) and 20 h ( $p = 0.50$ ), respectively.
